# Supplementary material
Source: publisher figshare collection journal article supplement (https://tandf.figshare.com/articles/dataset/_/11956515)
Supplement: Supplementary file 1 [file 2]

Archive with 12 entries (12 files):
- Online Supplement for Hierarchical Sparse Functional Principal Component Analysis for Multistage Multivariate Profile Data by Kai Wang and Fugee Tsung.pdf
- fig1.pdf
- fig10.jpg
- fig11.pdf
- fig2.JPG
- fig3.pdf
- fig4.pdf
- fig5.jpeg
- fig6.pdf
- fig7.jpg
- fig8.pdf
- fig9.pdf
