# Supplementary material
Source: publisher figshare collection journal article supplement (https://tandf.figshare.com/articles/dataset/_/11956515)

### Chamber 1

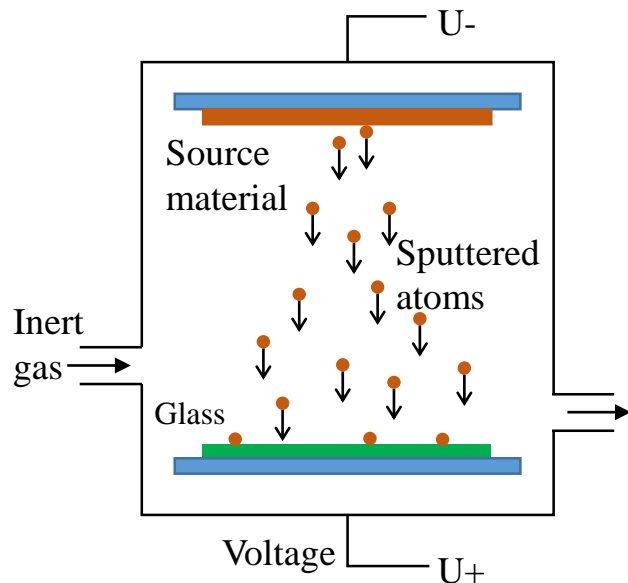

#### Stage 1: Pre-coating

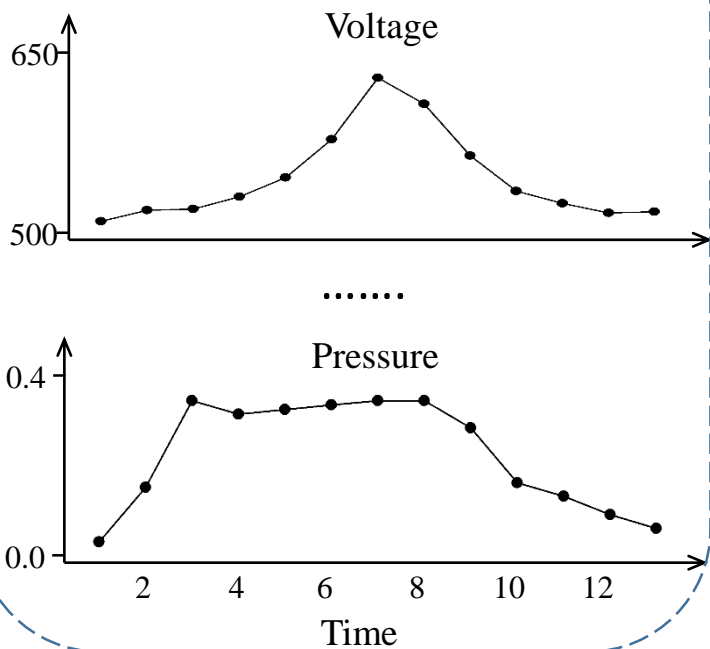

### Chamber 2

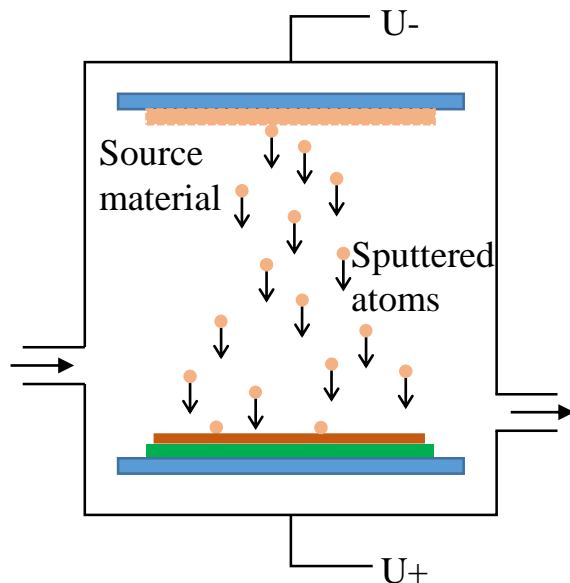

#### Stage 2: Coating

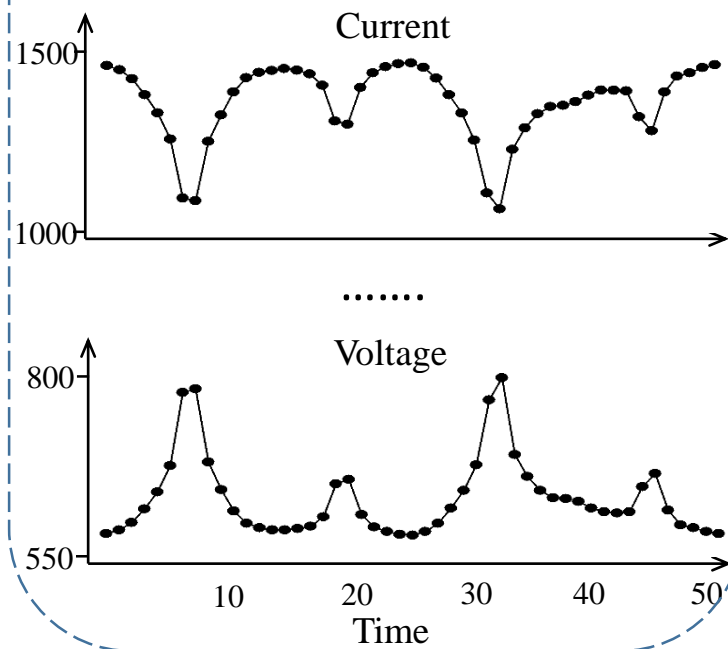

### Chamber 3

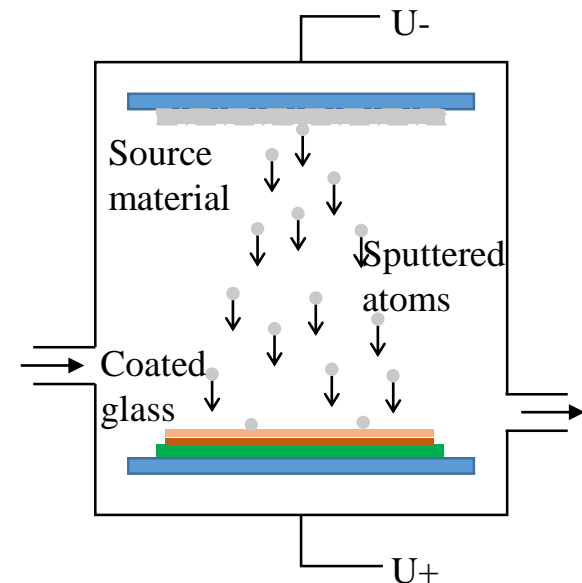

#### Stage 3: Post-coating

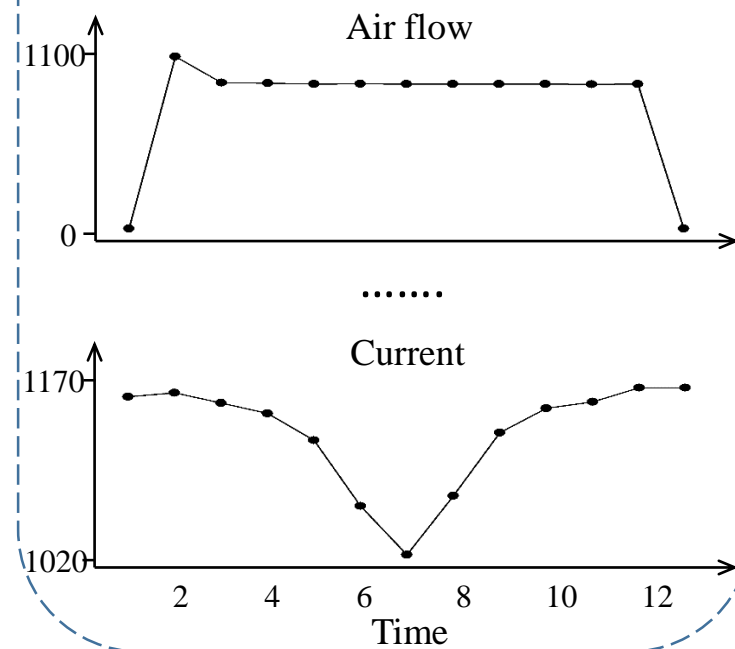

Supplement: Supplementary file 1 [file 2 › fig1.pdf]

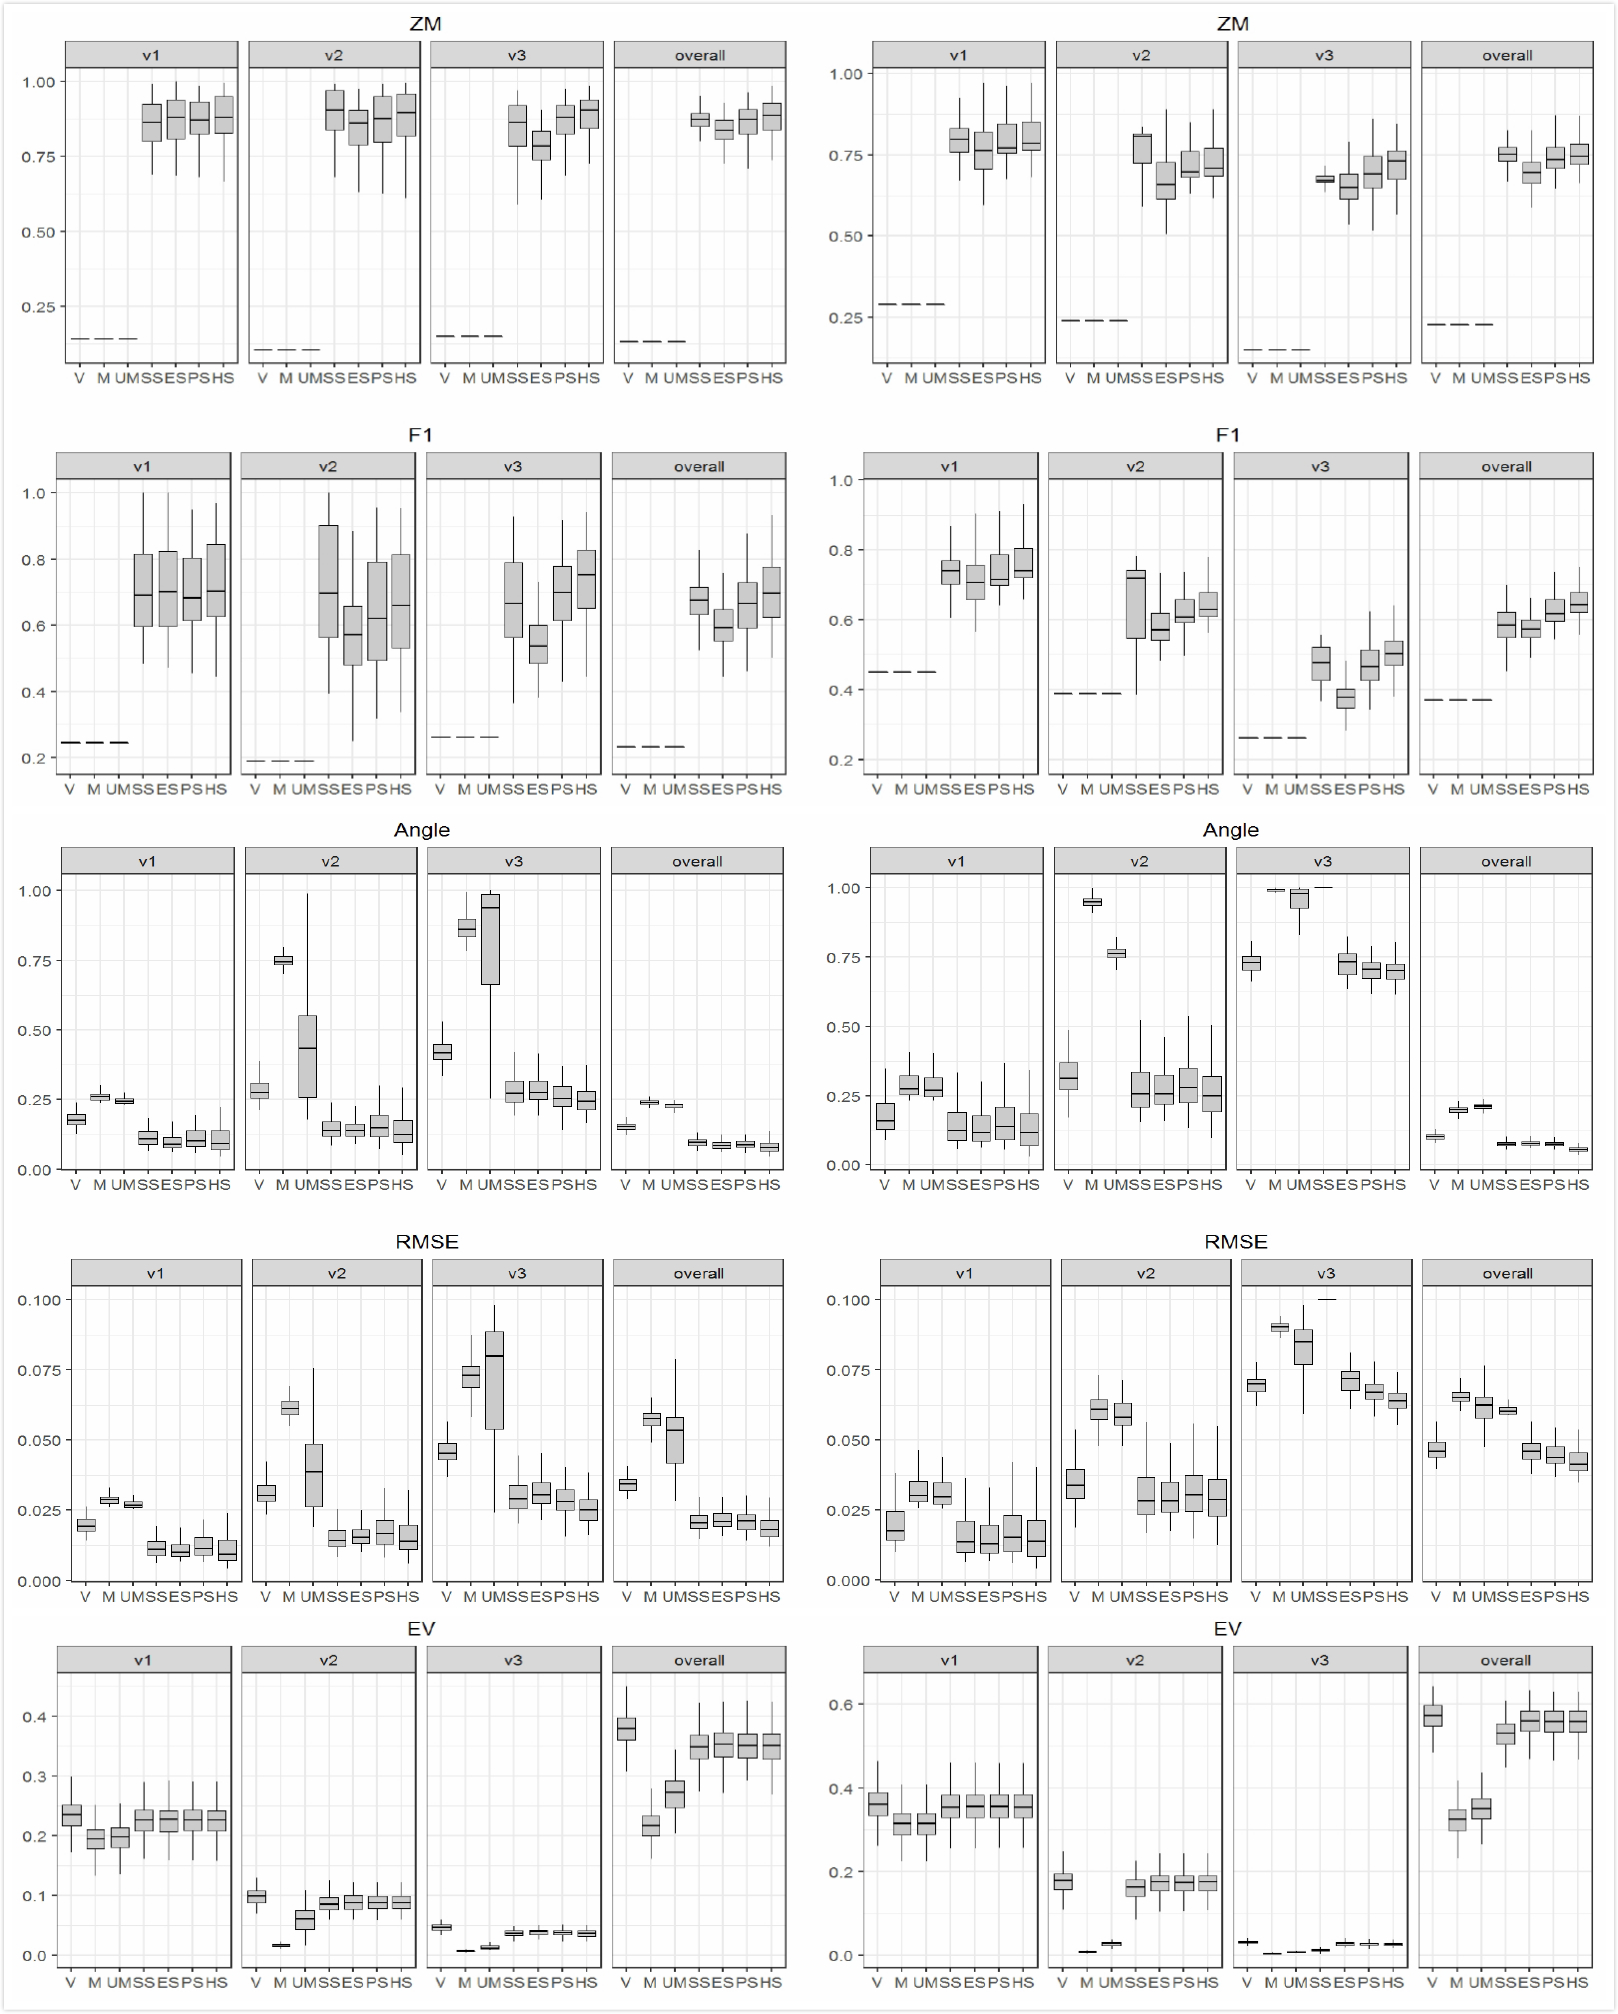

Supplement: Supplementary file 1 [file 2 › fig10.jpg]

Centered and standardized profile data

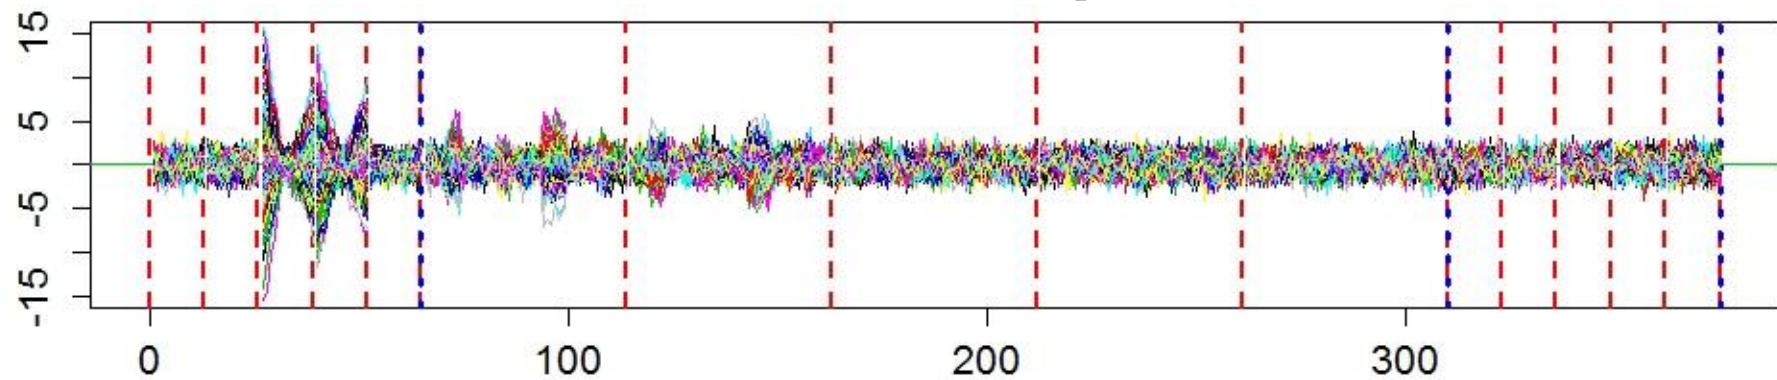

$\hat{\mathbf{v}}_1, df = 20, EV = 0.2915$

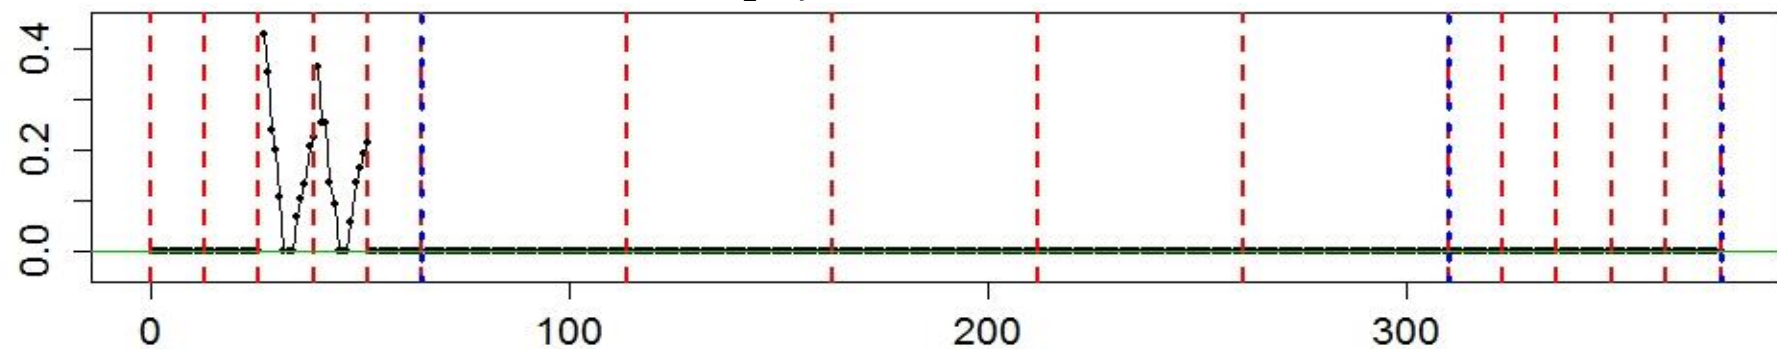

$\hat{\mathbf{v}}_2, df = 99, EV = 0.1050$

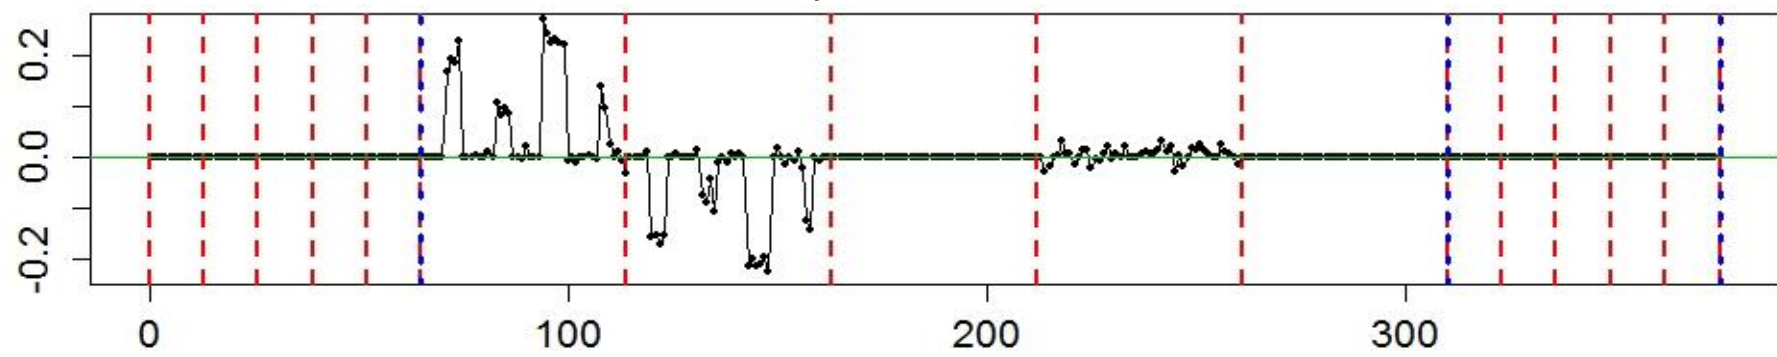

Supplement: Supplementary file 1 [file 2 › fig11.pdf]

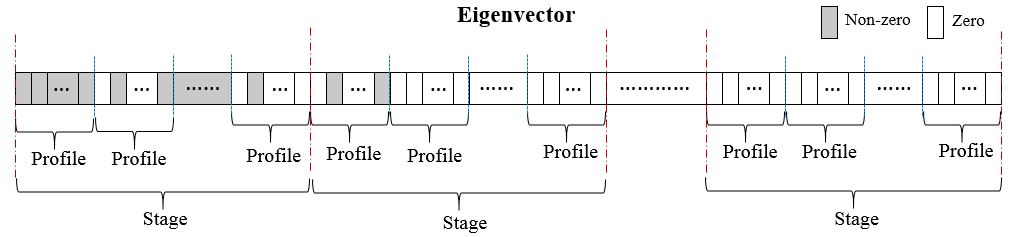

Supplement: Supplementary file 1 [file 2 › fig2.JPG]

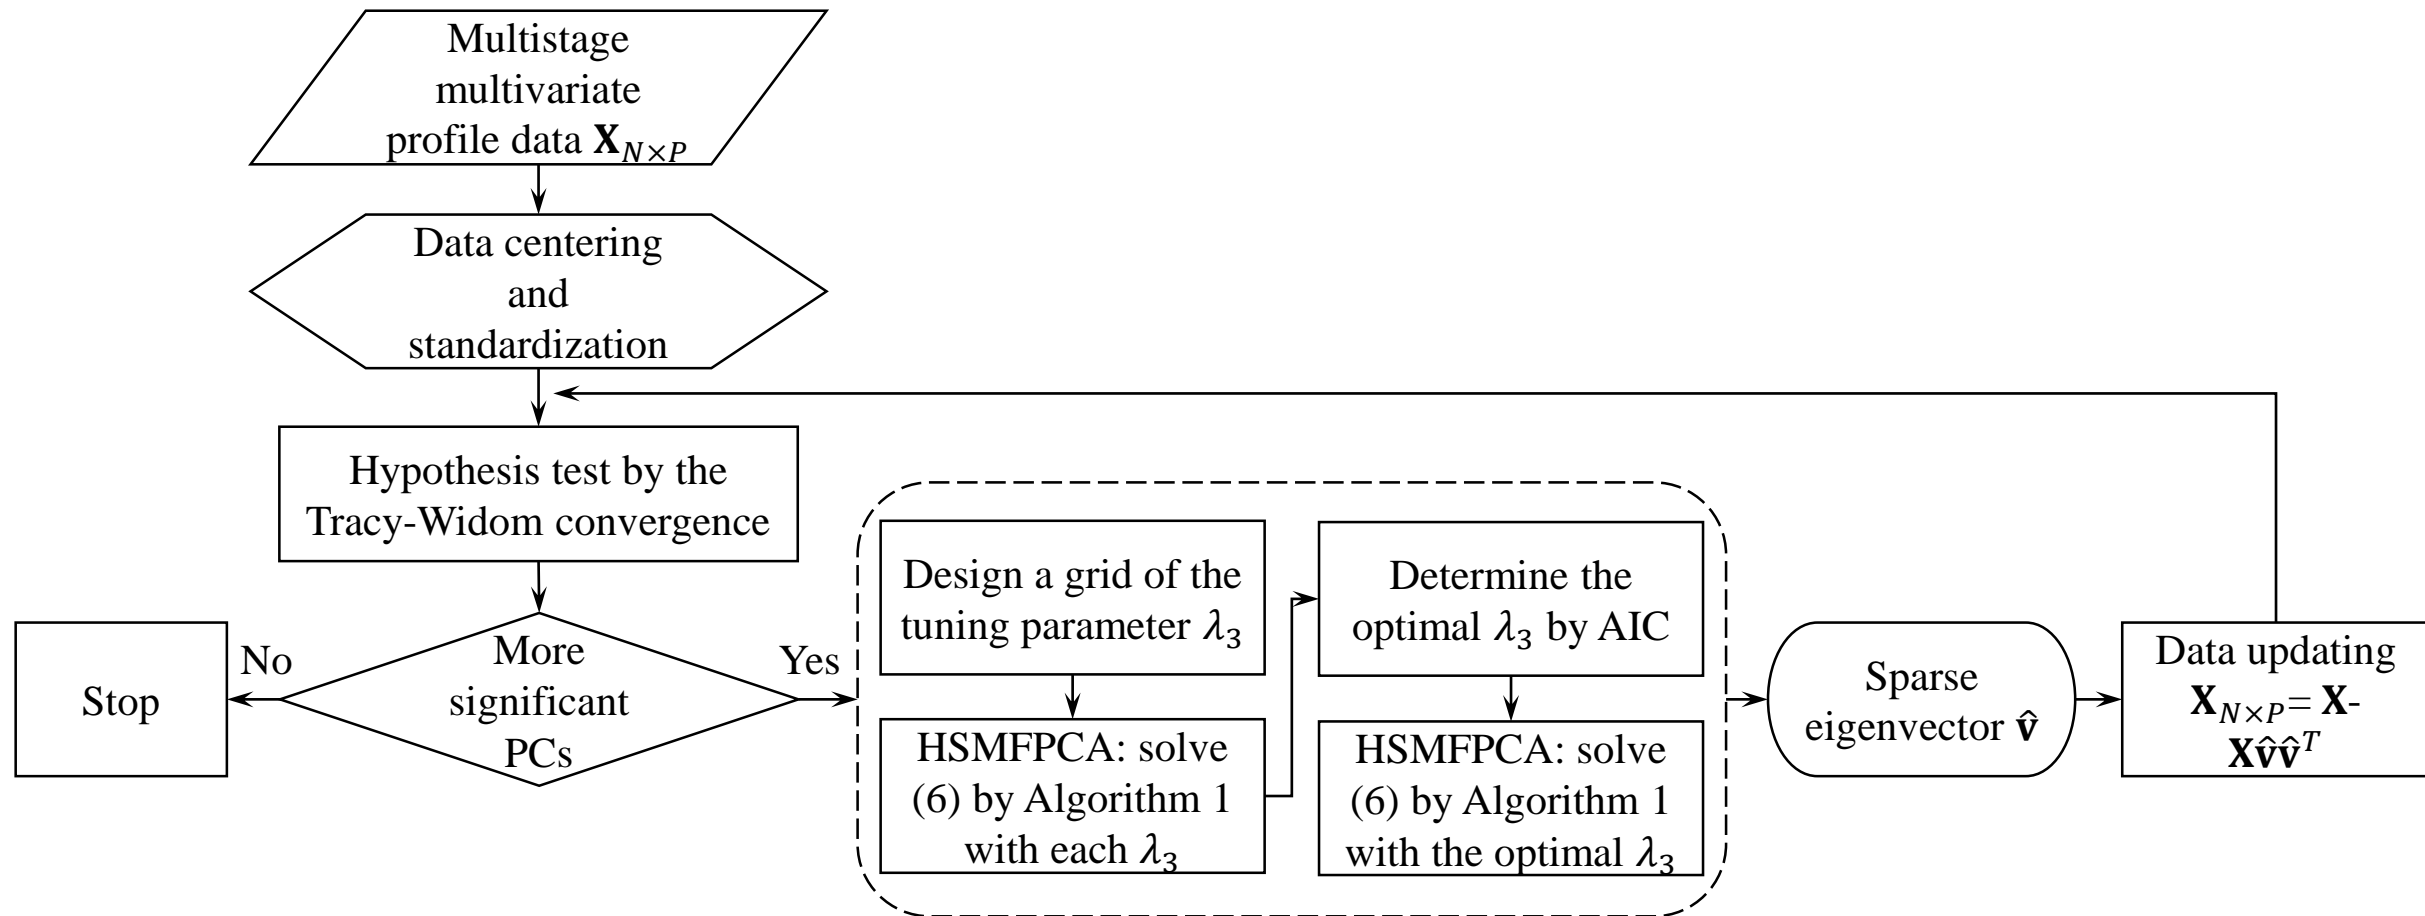

Supplement: Supplementary file 1 [file 2 › fig3.pdf]

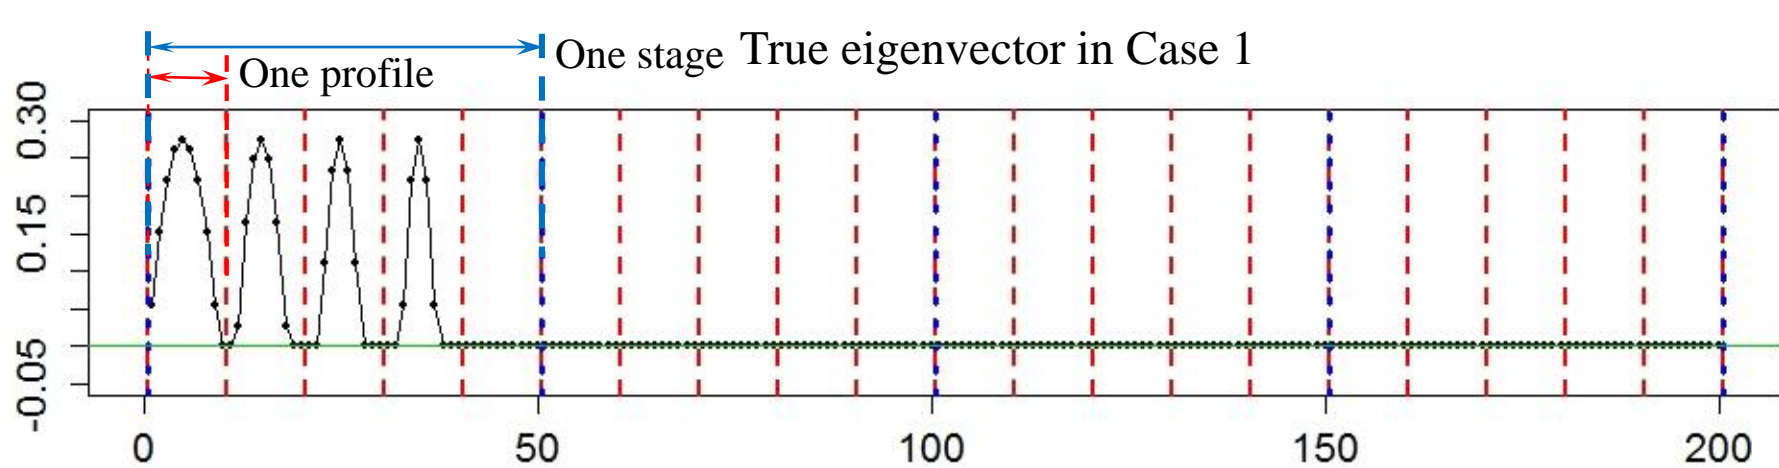

$\lambda_3 = 0.0, df = 200$

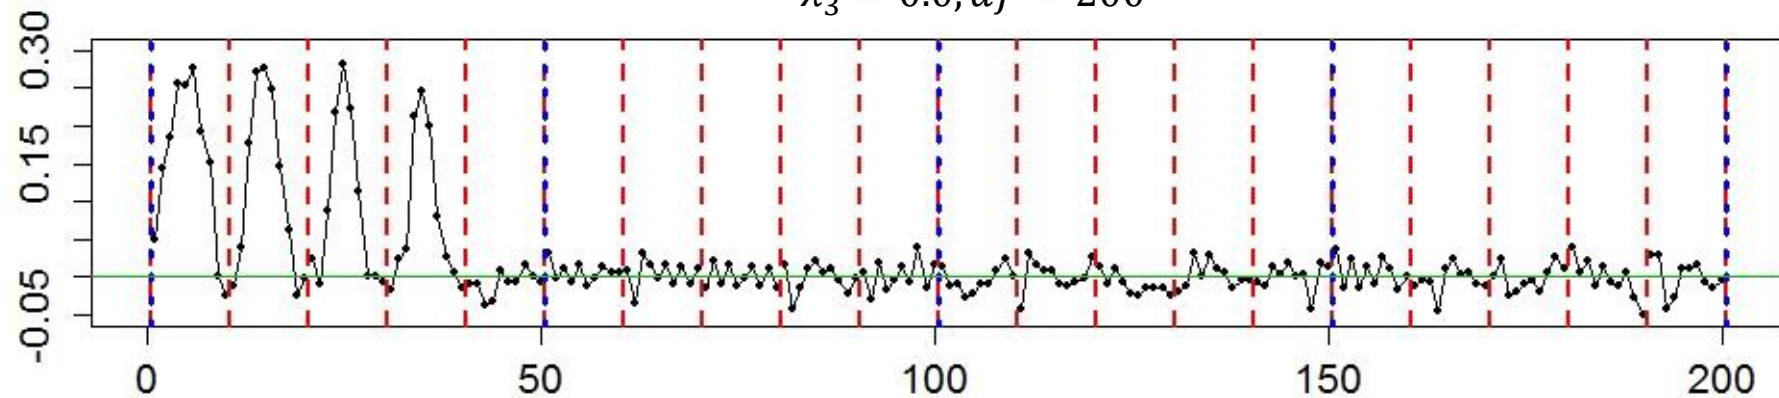

$\lambda_3 = 3.5, df = 161$

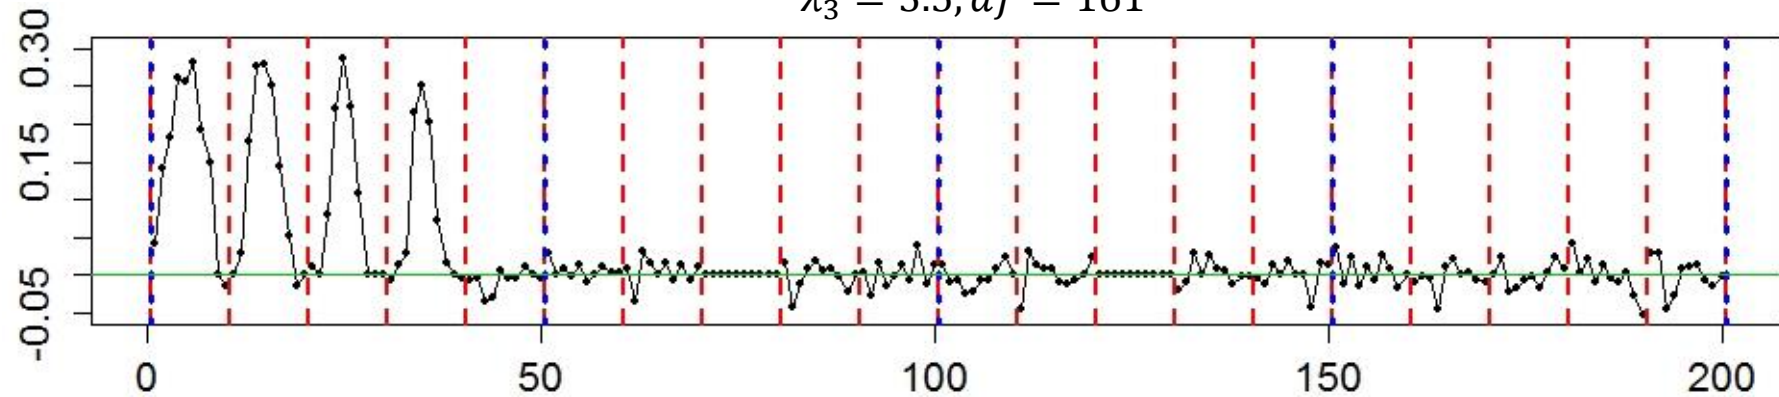

$\lambda_3 = 6.8, df = 31$

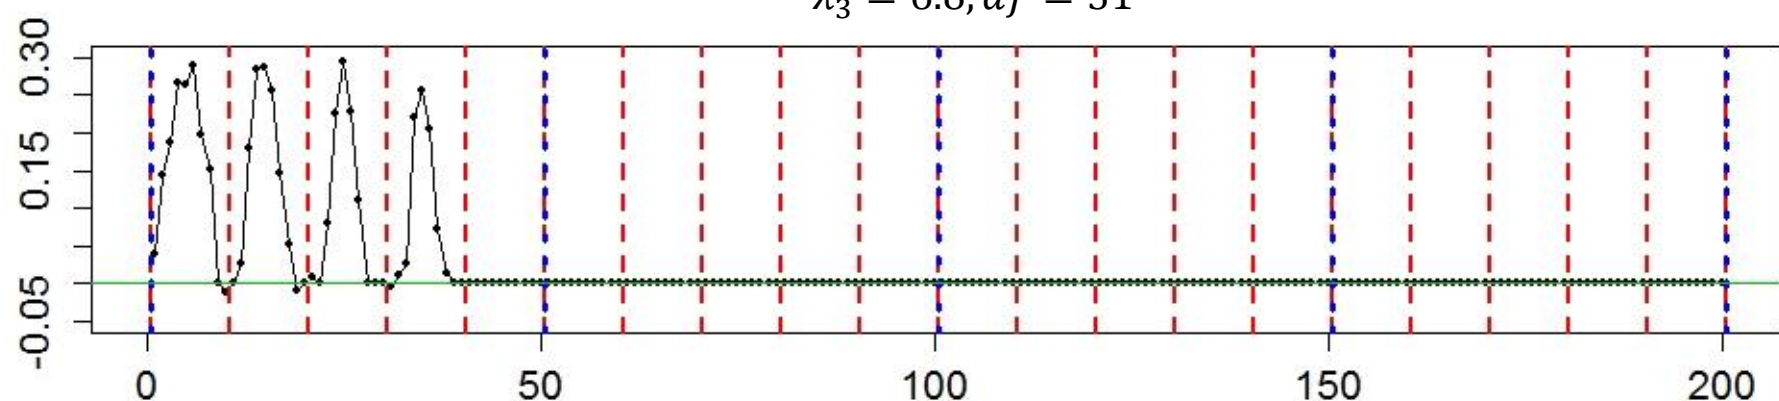

$\lambda_3 = 10.0, df = 31$

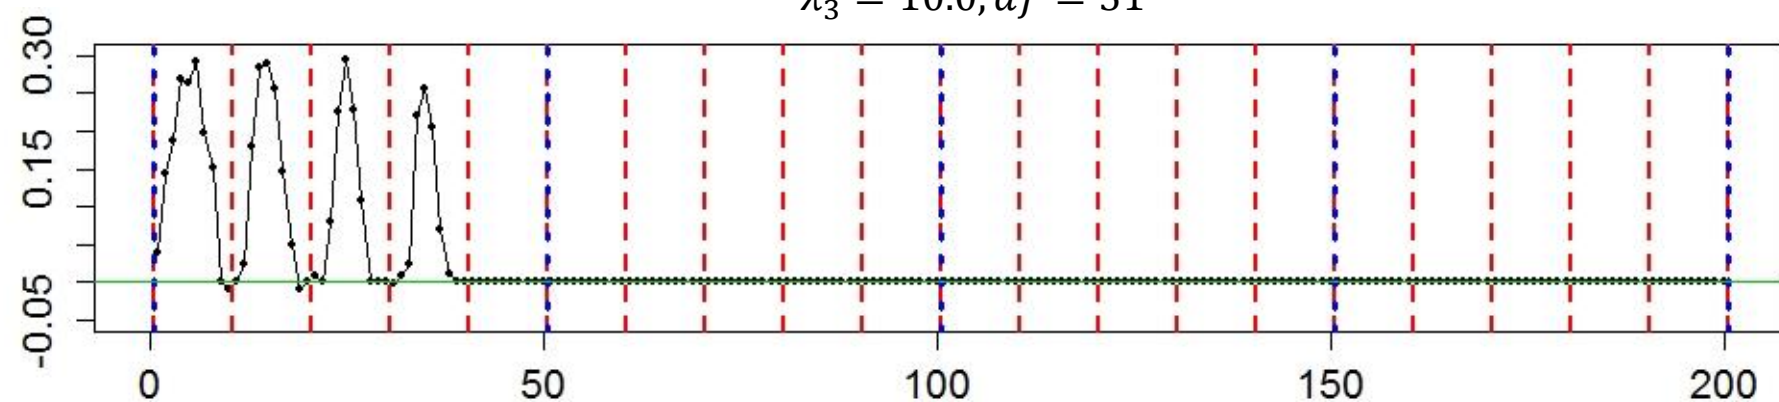

Supplement: Supplementary file 1 [file 2 › fig4.pdf]

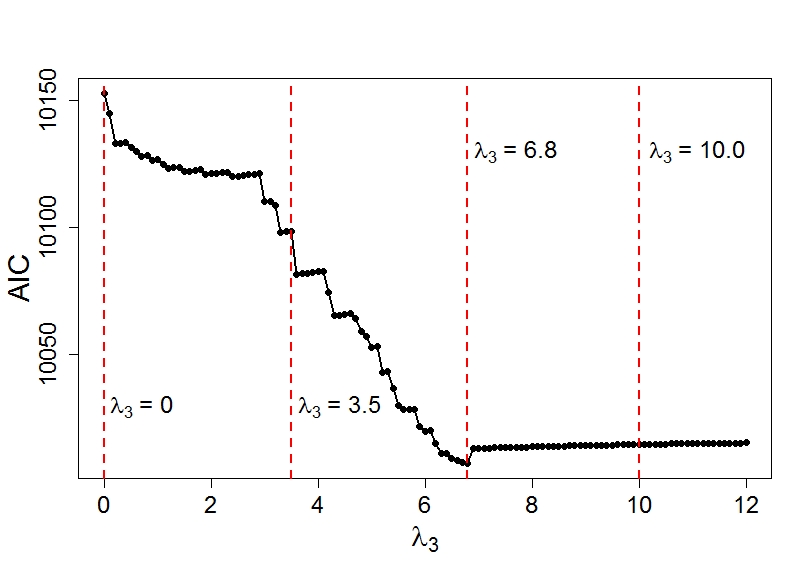

Supplement: Supplementary file 1 [file 2 › fig5.jpeg]

Case 2

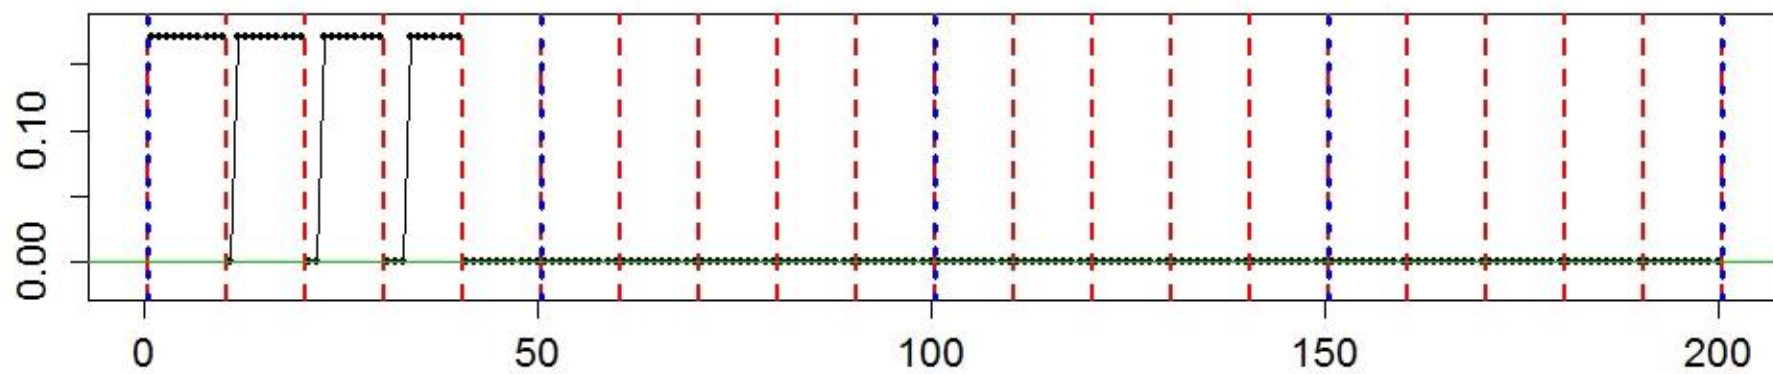

Case 3

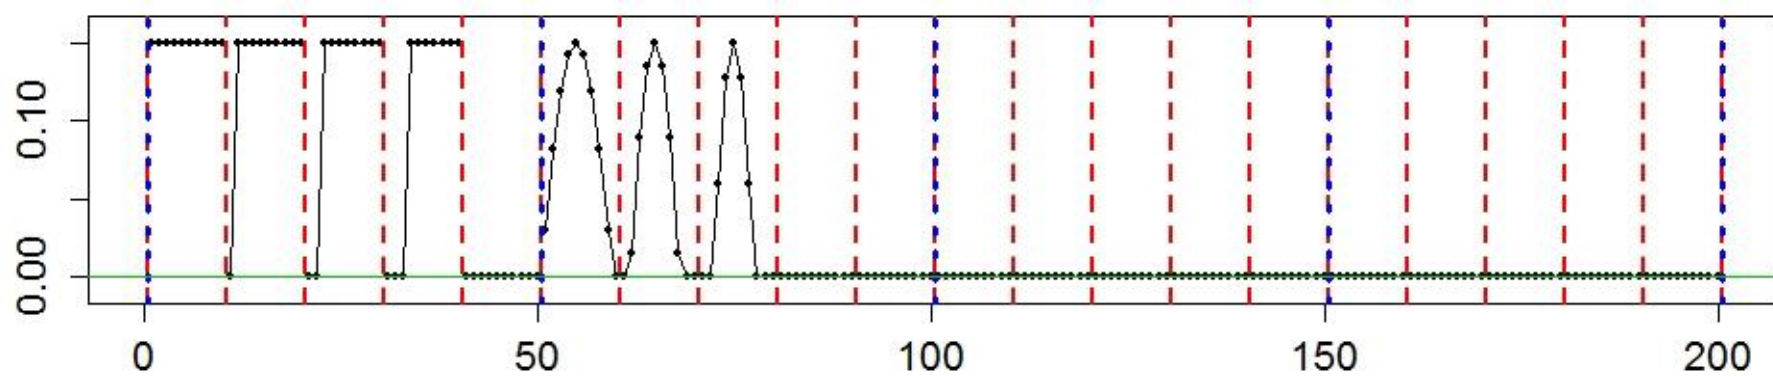

Case 4

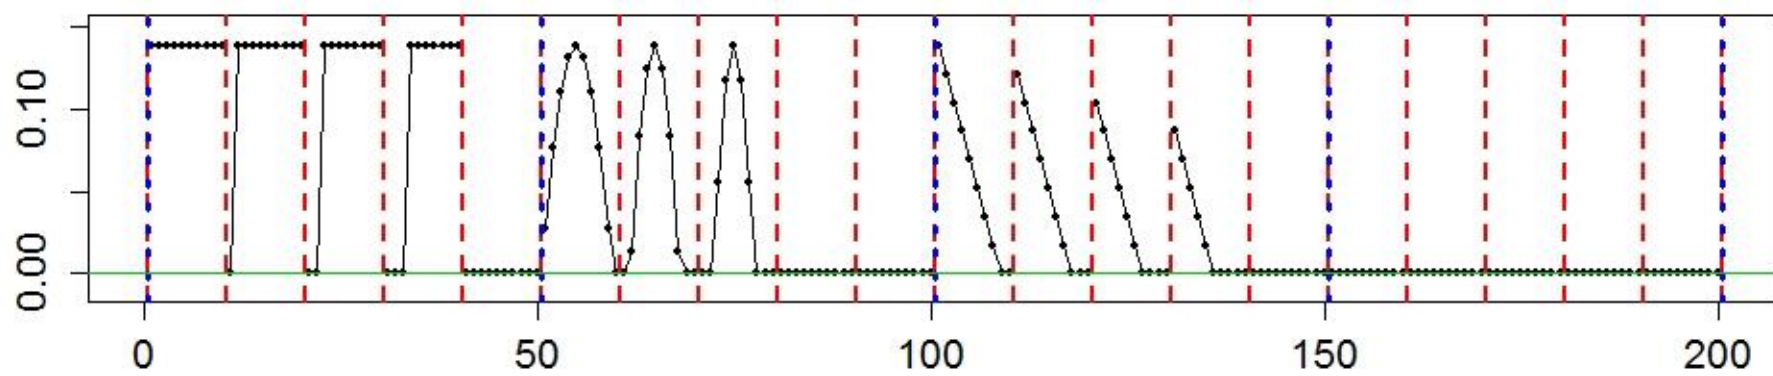

Case 5

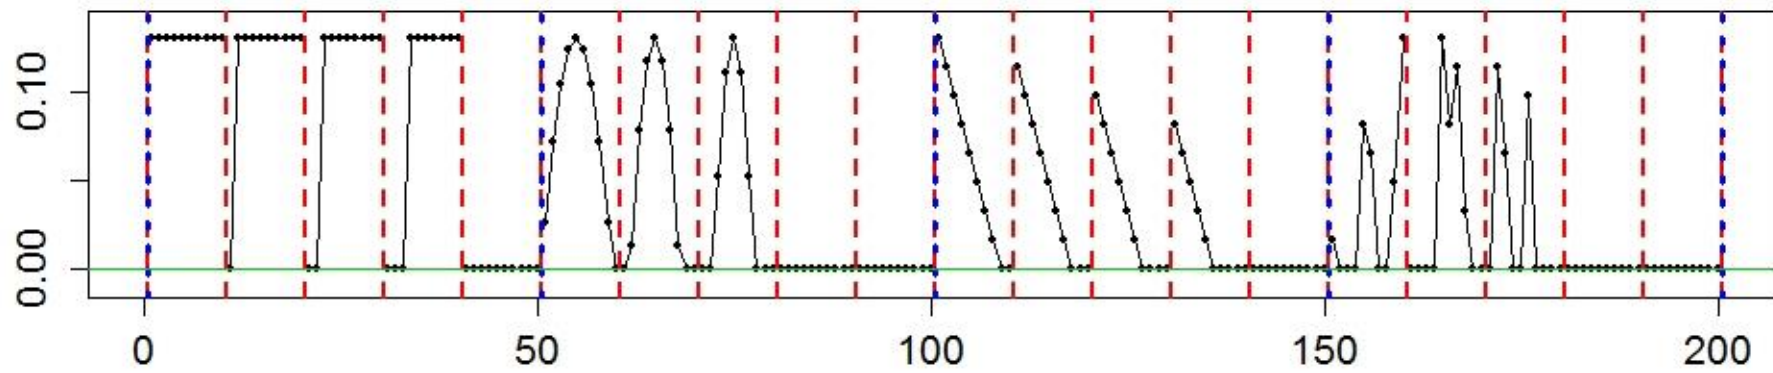

Case 6

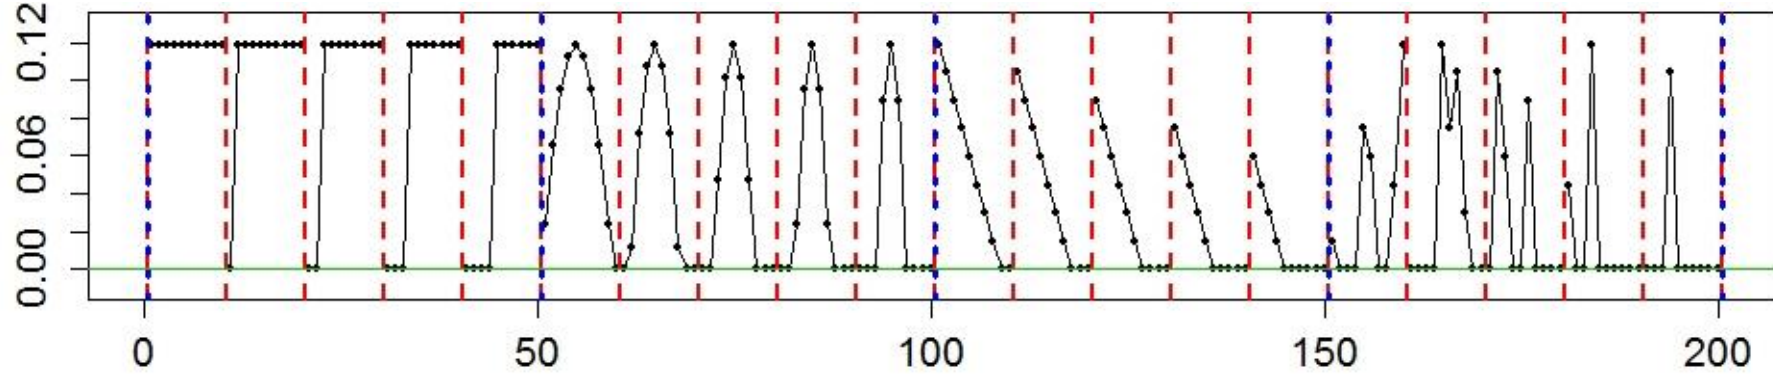

Supplement: Supplementary file 1 [file 2 › fig6.pdf]

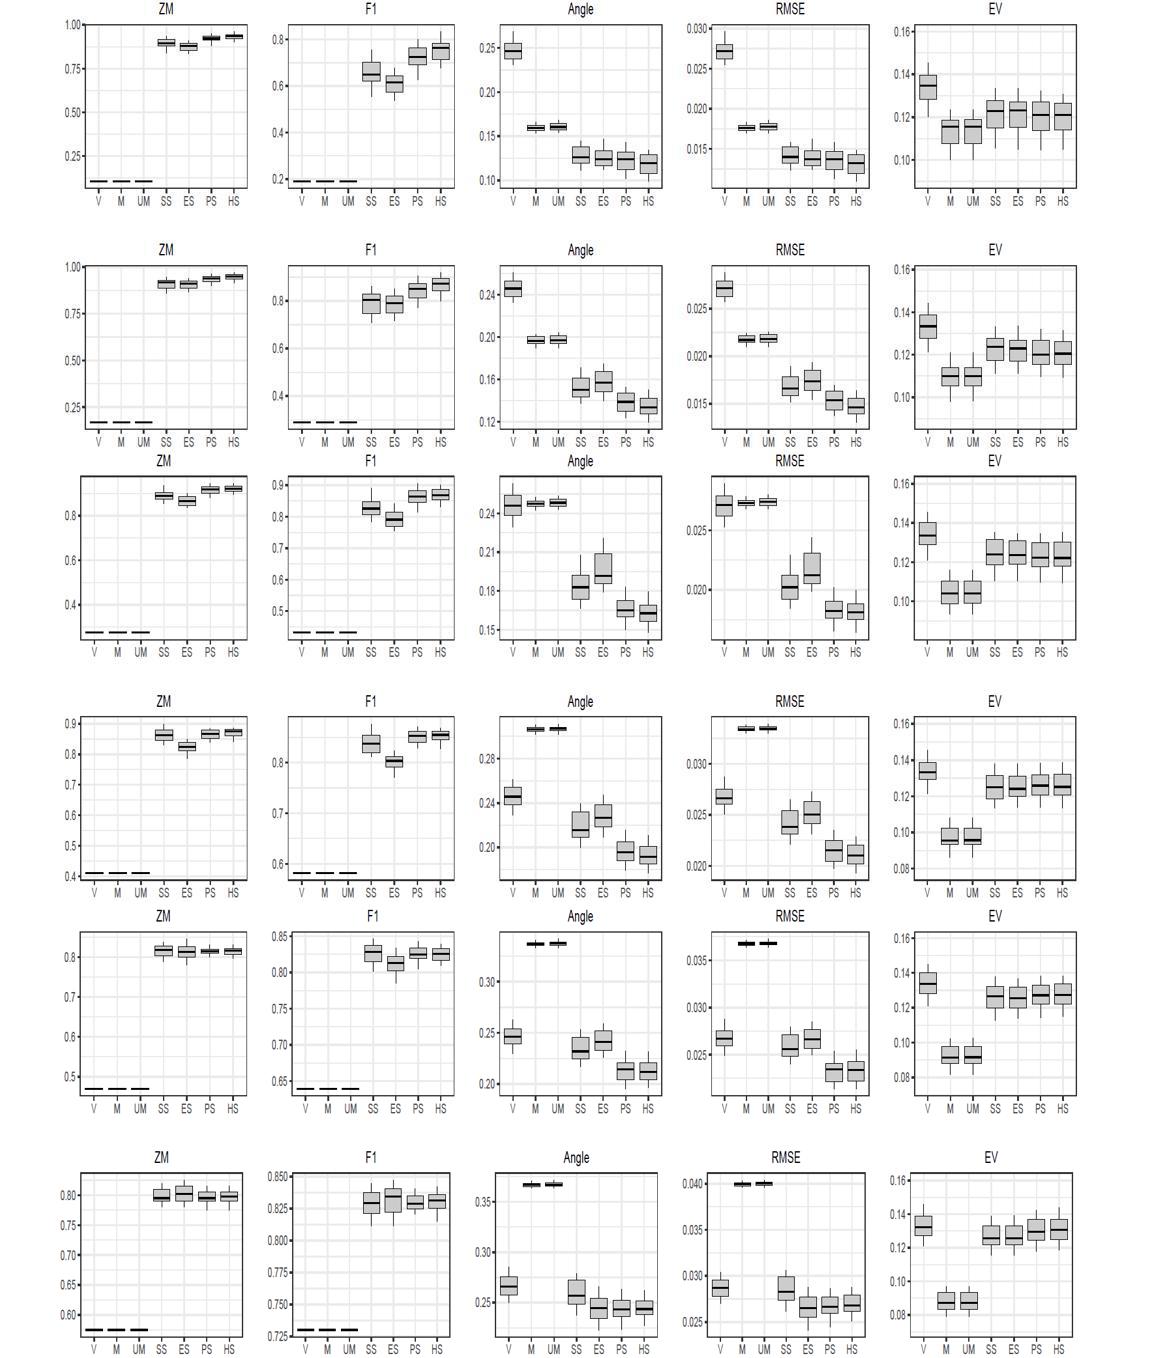

Supplement: Supplementary file 1 [file 2 › fig7.jpg]

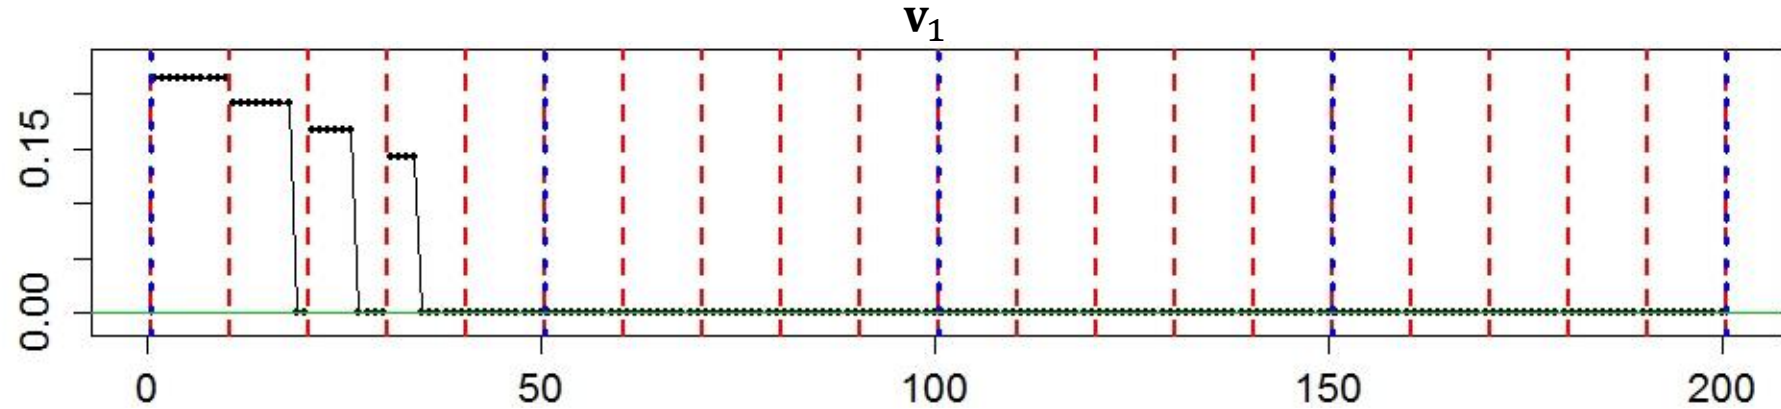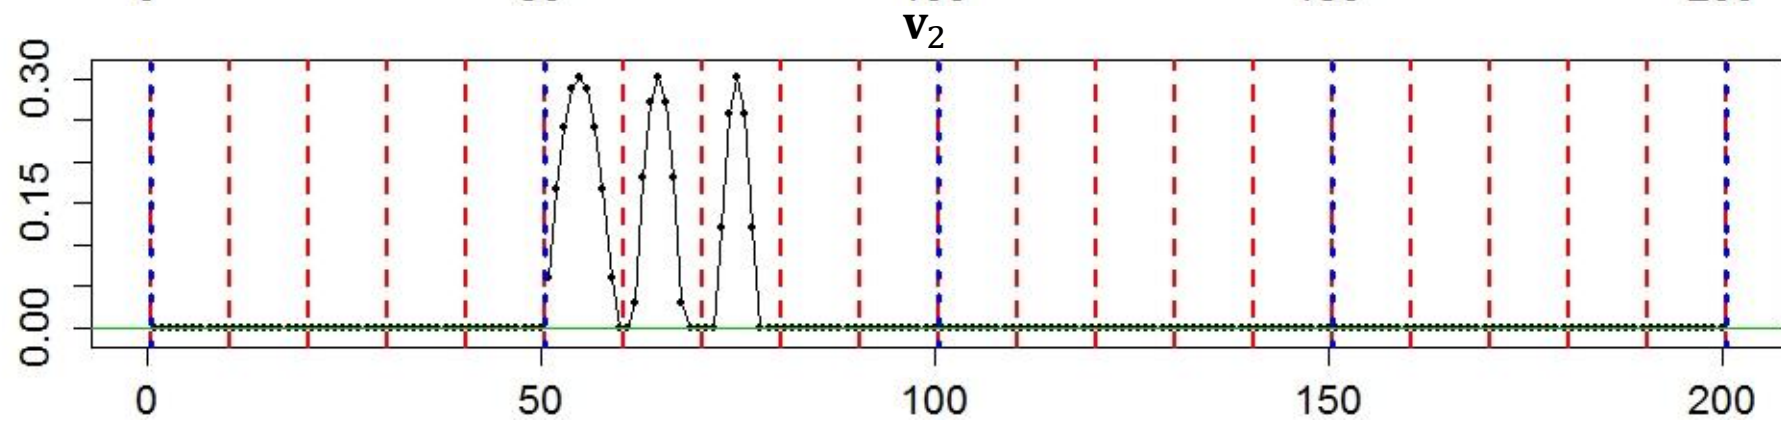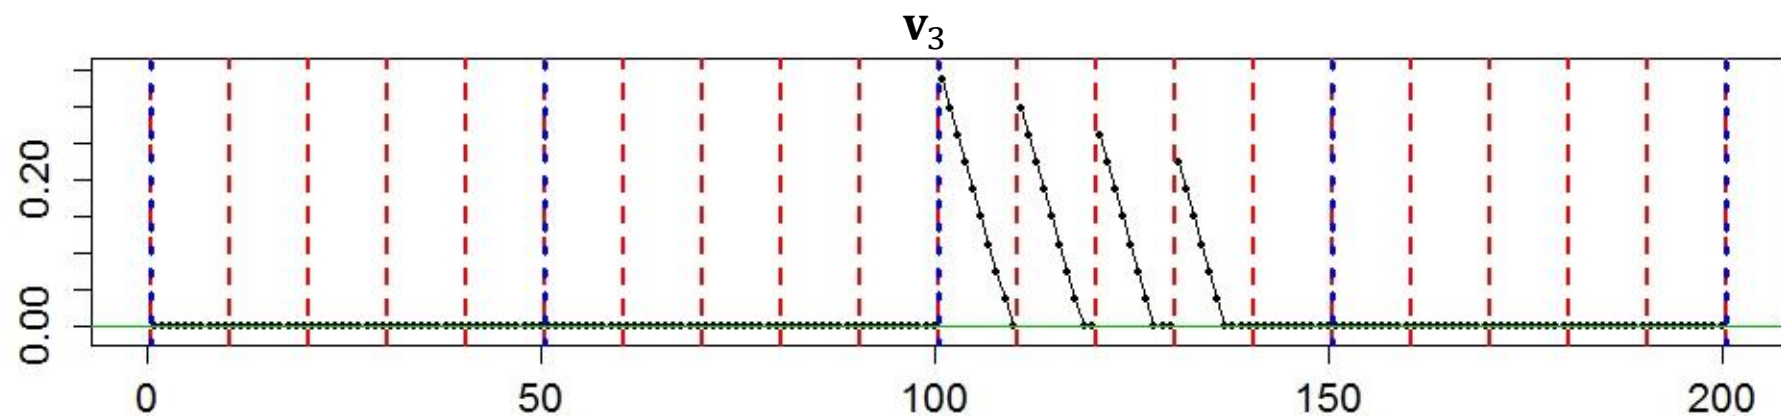

Supplement: Supplementary file 1 [file 2 › fig8.pdf]

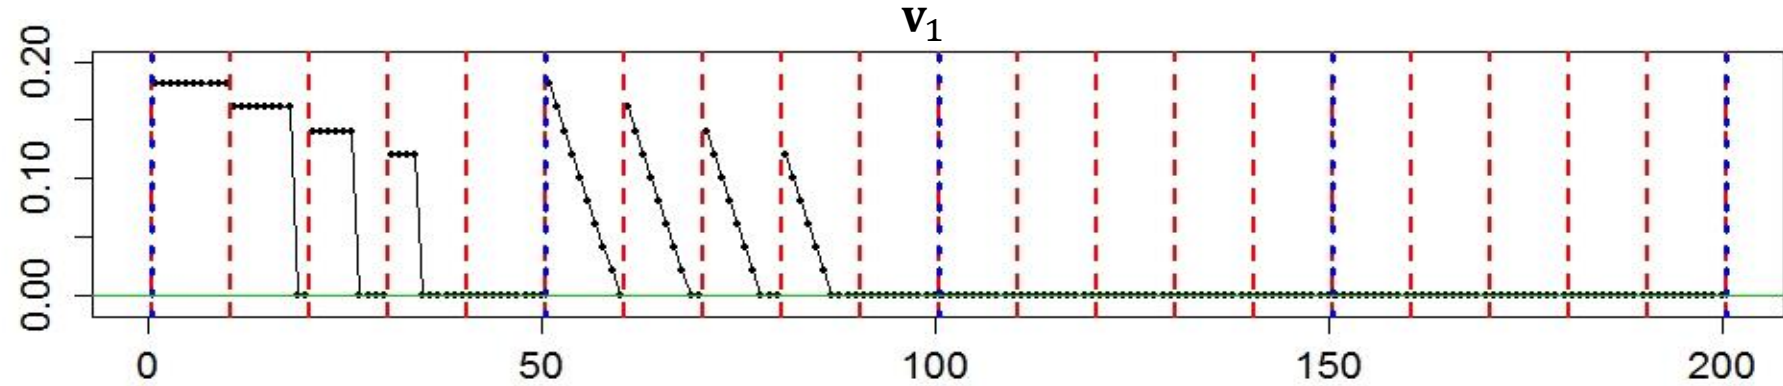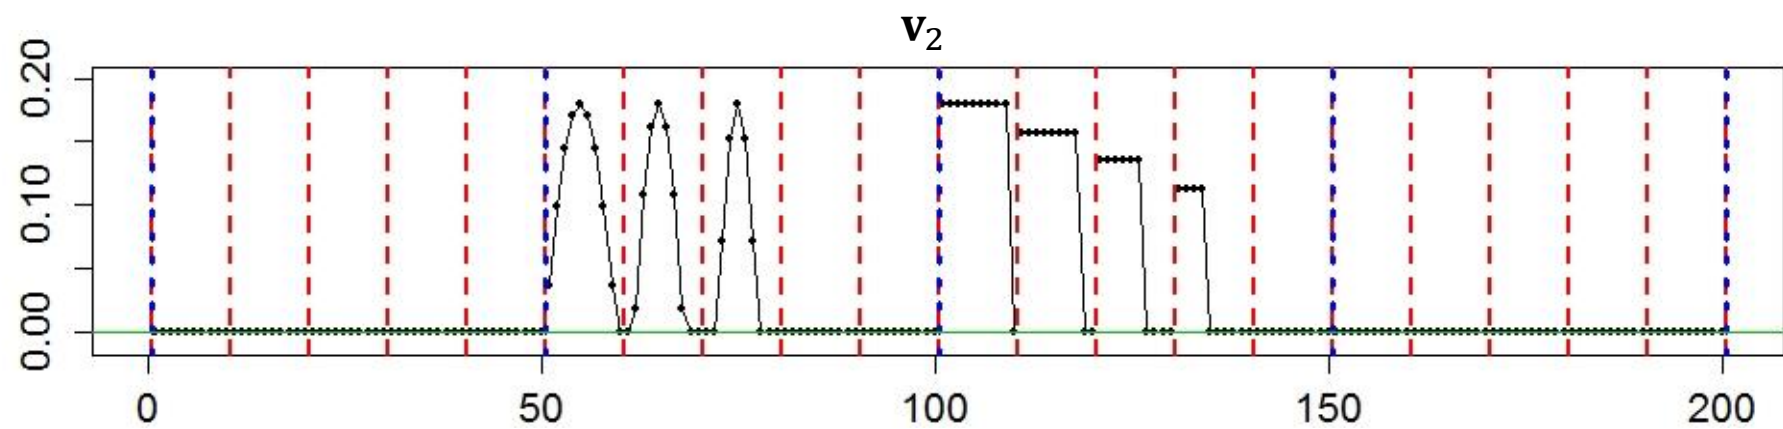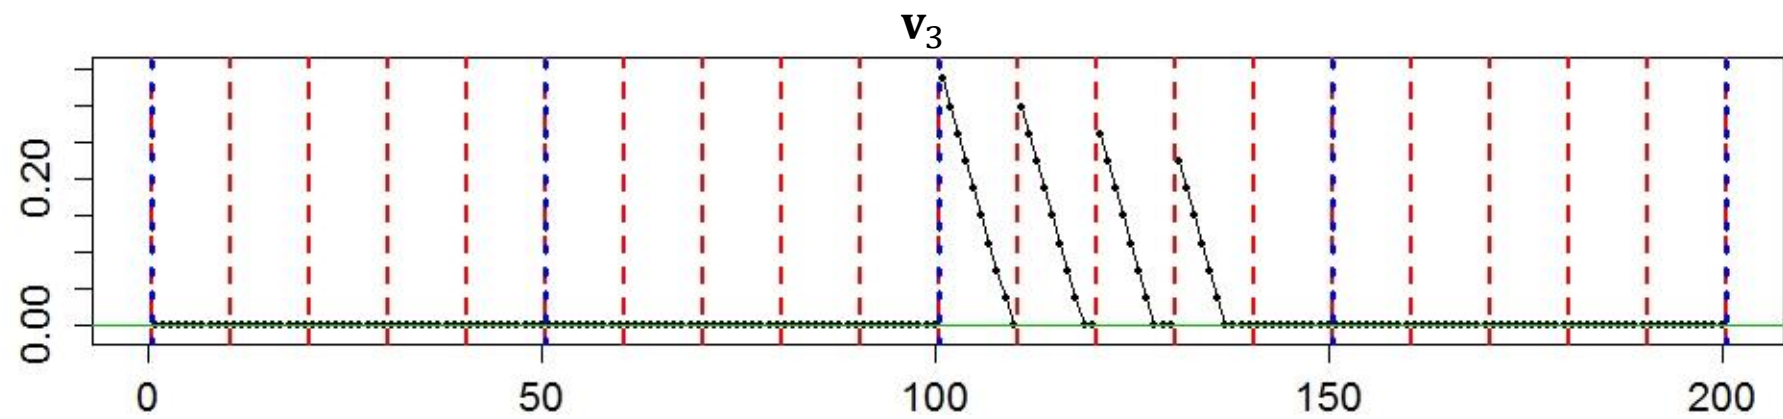

Supplement: Supplementary file 1 [file 2 › fig9.pdf]
